# Supplementary material for: Optimization of hair follicle spheroids for hair-on-a-chip
Source: Royal Society of Chemistry journal article supplement (doi:10.1039/d3bm02012f), 2024-01-01
Supplement: d3bm02012f1.pdf [file d3bm02012f1.pdf]

## Supporting Information

### Optimization of hair follicle spheroids for the hair-on-a-chip

*Subin Jeong, Hyeon-Min Nam and Gun Yong Sung*

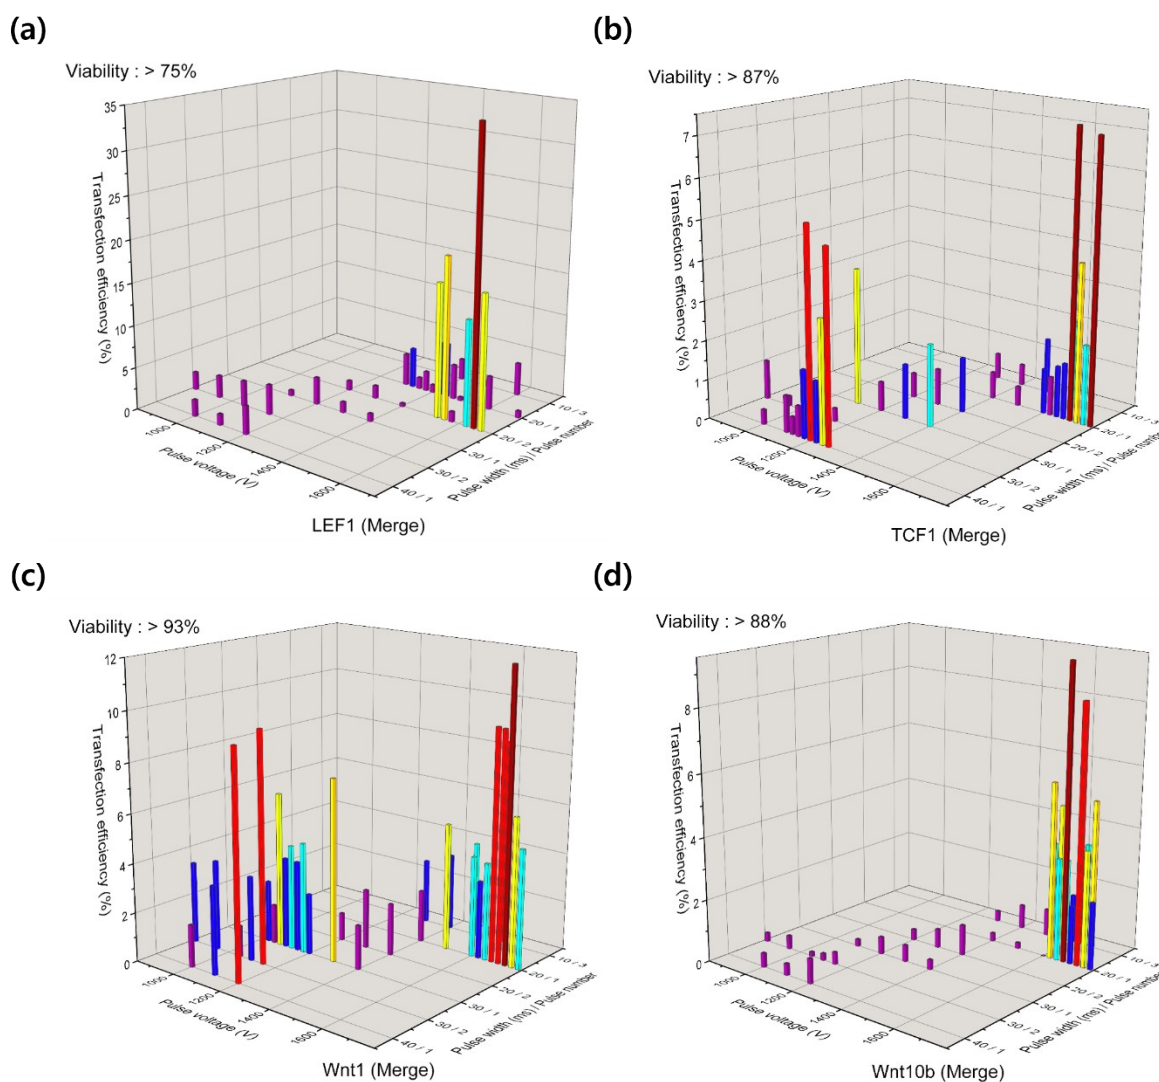

**Fig. S1** transfection efficiency measured by pDNA when electroporation is applied. transfection efficiency was calculated using equation (1) and cell viability was calculated using equation (2).

#### Equation S1

$$\left( \frac{\text{number of transfected cells}}{\text{number of live cells}} \right) \times 100\% \quad (1)$$

### Equation S2

$$\left( \frac{\text{number of stained nuclei} - \text{number of stained dead cell nuclei}}{\text{number of stained nuclei}} \right) \times 100\% \quad (2)$$

**Table. S1** Optimal conditions for electroporation using pDNA. Calculate transfection efficiency and cell viability using equation (1) and equation (2).

| Plasmid DNA | Pulse voltage | Pulse width | Pulse number | Transfection efficiency | Cell viability |
|-------------|---------------|-------------|--------------|-------------------------|----------------|
| LEF1        | 1450 V        | 20 ms       | 1            | 6.46 %                  | 98.7 %         |
| TCF1        | 1700 V        | 20 ms       | 1            | 7.3 %                   | 91 %           |
| Wnt10b      | 1675 V        | 20 ms       | 1            | 9.5 %                   | 88.6 %         |
| Wnt1        | 1725 V        | 20 ms       | 1            | 11.9 %                  | 97.6 %         |

**Table. S2** Comparison of effectiveness and viability of lipofection and electroporation. Transfection efficiency is calculated using equation (1) and cell viability is calculated using equation (2).

| Type of transfection | Plasmid DNA | Transfection efficiency (LEF1) | Transfection efficiency (TCF1) | Cell viability |
|----------------------|-------------|--------------------------------|--------------------------------|----------------|
| Lipofection          | LEF1 & TCF1 | 0.4%                           | 0.68%                          | 66.51%         |
|                      | LEF1        | 0.82%                          | -                              | 82.53%         |
|                      | TCF1        | -                              | 0.98%                          | 90.69%         |
| Electroporation      | LEF1 & TCF1 | 0.98%                          | 0.49%                          | 96.63%         |
|                      | LEF1        | 6.46%                          | -                              | 98.7%          |
|                      | TCF1        | -                              | 7.3%                           | 91%            |

**Table. S3** list of primer sequences used for qPCR.

| Gene  | Forward                       | Reverse                       |
|-------|-------------------------------|-------------------------------|
| GAPDH | 5'-CTCCTCTGACTTCAACAGCG-3'    | 5'-GCCAAATTCGTTGTCATACCAG-3'  |
| LEF1  | 5'-CTACCCATCCTCACTGTCAGTC-3'  | 5'-GGATGTTCTGTTTGACCTGAGG-3'  |
| TCF1  | 5'-CTGACCTCTCTGGCTTCTACTC-3'  | 5'-CAGAACCTAGCATCAAGGATGGG-3' |
| Wnt1  | 5'-CTCATGAACCTTCACAACAACGA-3' | 5'-TGGCGCATCTCGGAGAAT-3'      |

Wnt10b

5'-CTCGGGATTCTTGGATTCCAGG-3'

5'-GCCATGACACTTGCATTCCGC-3'

---
